# Supplementary material for: Changes in Phytochemical Compositions and Biological Activities After Fermentation According to the Harvest Periods of Mountain-Cultivated Ginseng Sprouts
Source: MDPI journal article supplement (doi:10.3390/foods15040774), 2026-02-20
Supplement: s1 [file foods-4150084-supplementary.pdf › foods-4150084-supplementary.pdf]

## **Supplementary materials**

**Table S1.** Comparisons of free amino acid compositions of raw material and fermentation according to the harvest periods of mountain-cultivated ginseng sprouts.

| Contents <sup>1</sup><br>(mg/ 100 g) | Harvest periods            |                           |                            |                           |                            |                           |                            |                           |
|--------------------------------------|----------------------------|---------------------------|----------------------------|---------------------------|----------------------------|---------------------------|----------------------------|---------------------------|
|                                      | 17-May                     |                           | 31-May                     |                           | 21-June                    |                           | 13-July                    |                           |
|                                      | MCGS <sup>2</sup>          | FAMCGS                    | MCGS                       | FAMCGS                    | MCGS                       | FAMCGS                    | MCGS                       | FAMCGS                    |
| <b>Non-essential amino acids</b>     |                            |                           |                            |                           |                            |                           |                            |                           |
| Phosphoethanolamine                  | nd <sup>3</sup>            | nd                        | 15.34 ± 0.12 <sup>a</sup>  | nd                        | 14.79 ± 0.14 <sup>b</sup>  | nd                        | nd                         | nd                        |
| Proline                              | 28.42 ± 0.02 <sup>a</sup>  | 3.55 ± 0.03 <sup>c</sup>  | 17.50 ± 0.25 <sup>a</sup>  | 2.61 ± 0.01 <sup>d</sup>  | 10.00 ± 0.10 <sup>b</sup>  | 3.21 ± 0.01 <sup>c</sup>  | 11.20 ± 0.22 <sup>b</sup>  | 2.00 ± 0.02 <sup>d</sup>  |
| Hydroxyproline                       | 0.38 ± 0.00 <sup>b</sup>   | nd                        | 0.42 ± 0.00 <sup>a</sup>   | nd                        | nd                         | nd                        | nd                         | nd                        |
| Aspartic acid                        | 81.65 ± 0.80 <sup>a</sup>  | 32.77 ± 0.21 <sup>c</sup> | 42.33 ± 0.41 <sup>b</sup>  | 19.86 ± 0.11 <sup>d</sup> | 39.24 ± 0.35 <sup>c</sup>  | 16.01 ± 0.12 <sup>d</sup> | 51.04 ± 0.85 <sup>b</sup>  | 18.97 ± 0.35 <sup>d</sup> |
| Serine                               | 49.14 ± 0.49 <sup>a</sup>  | 11.91 ± 0.11 <sup>c</sup> | 31.16 ± 0.12 <sup>b</sup>  | 6.90 ± 0.05 <sup>d</sup>  | 25.14 ± 0.51 <sup>b</sup>  | 6.59 ± 0.05 <sup>d</sup>  | 30.91 ± 0.54 <sup>b</sup>  | 8.14 ± 0.09 <sup>c</sup>  |
| Aspartic acid - NH <sub>2</sub>      | 83.85 ± 0.81 <sup>a</sup>  | 17.90 ± 0.14 <sup>c</sup> | 32.87 ± 0.21 <sup>b</sup>  | 5.37 ± 0.06 <sup>d</sup>  | 28.73 ± 0.24 <sup>c</sup>  | 3.69 ± 0.04 <sup>d</sup>  | 45.86 ± 0.84 <sup>b</sup>  | 12.33 ± 0.25 <sup>c</sup> |
| Glutamic acid                        | 33.63 ± 0.31 <sup>a</sup>  | 16.39 ± 0.15 <sup>c</sup> | 25.58 ± 0.11 <sup>b</sup>  | 10.20 ± 0.15 <sup>c</sup> | 25.53 ± 0.25 <sup>b</sup>  | 8.54 ± 0.08 <sup>d</sup>  | 33.15 ± 0.66 <sup>a</sup>  | 11.56 ± 0.32 <sup>c</sup> |
| Sarcosine                            | nd                         | nd                        | nd                         | nd                        | nd                         | nd                        | 3.00 ± 0.00 <sup>a</sup>   | nd                        |
| Aminoadipic acid                     | 5.04 ± 0.01 <sup>a</sup>   | 1.54 ± 0.01 <sup>c</sup>  | 2.09 ± 0.01 <sup>b</sup>   | nd                        | 1.71 ± 0.01 <sup>c</sup>   | nd                        | 3.03 ± 0.03 <sup>b</sup>   | 0.97 ± 0.01 <sup>d</sup>  |
| Glycine                              | 10.38 ± 0.11 <sup>a</sup>  | 6.55 ± 0.06 <sup>b</sup>  | 7.33 ± 0.08 <sup>b</sup>   | 5.21 ± 0.05 <sup>c</sup>  | 5.96 ± 0.05 <sup>c</sup>   | 5.06 ± 0.05 <sup>d</sup>  | 6.96 ± 0.09 <sup>b</sup>   | 4.81 ± 0.04 <sup>d</sup>  |
| Alanine                              | 67.95 ± 0.25 <sup>a</sup>  | 10.12 ± 0.10 <sup>d</sup> | 46.91 ± 0.45 <sup>b</sup>  | 7.02 ± 0.07 <sup>e</sup>  | 32.88 ± 0.61 <sup>c</sup>  | 9.93 ± 0.09 <sup>d</sup>  | 45.01 ± 0.90 <sup>b</sup>  | 12.80 ± 0.15 <sup>d</sup> |
| Citrulline                           | nd                         | 3.51 ± 0.02 <sup>b</sup>  | nd                         | 5.12 ± 0.02 <sup>a</sup>  | nd                         | 5.36 ± 0.05 <sup>a</sup>  | 1.20 ± 0.01 <sup>d</sup>   | 2.31 ± 0.02 <sup>c</sup>  |
| α-aminobutyric acid                  | 22.91 ± 0.02 <sup>a</sup>  | 5.26 ± 0.05 <sup>c</sup>  | 8.18 ± 0.08 <sup>b</sup>   | 1.07 ± 0.01 <sup>d</sup>  | 8.07 ± 0.02 <sup>b</sup>   | 2.52 ± 0.03 <sup>d</sup>  | 6.14 ± 0.06 <sup>c</sup>   | 1.84 ± 0.15 <sup>d</sup>  |
| Cystathionine                        | nd                         | nd                        | 4.73 ± 0.04 <sup>a</sup>   | nd                        | 4.10 ± 0.01 <sup>b</sup>   | nd                        | nd                         | nd                        |
| Tyrosine                             | 23.02 ± 0.21 <sup>a</sup>  | 2.79 ± 0.12 <sup>d</sup>  | 16.34 ± 0.15 <sup>b</sup>  | 2.53 ± 0.02 <sup>d</sup>  | 8.78 ± 0.05 <sup>c</sup>   | 2.77 ± 0.02 <sup>d</sup>  | 11.53 ± 0.22 <sup>b</sup>  | 1.63 ± 0.01 <sup>d</sup>  |
| β-alanine                            | 15.72 ± 0.12 <sup>a</sup>  | 3.51 ± 0.12 <sup>c</sup>  | 6.49 ± 0.09 <sup>b</sup>   | 2.50 ± 0.01 <sup>d</sup>  | 5.43 ± 0.06 <sup>b</sup>   | 4.00 ± 0.01 <sup>c</sup>  | 5.96 ± 0.02 <sup>b</sup>   | 3.05 ± 0.03 <sup>d</sup>  |
| β-aminoisobutyric acid               | 9.88 ± 0.08 <sup>a</sup>   | 1.06 ± 0.01 <sup>d</sup>  | 4.36 ± 0.04 <sup>b</sup>   | 0.71 ± 0.01 <sup>d</sup>  | 3.85 ± 0.03 <sup>b</sup>   | 3.24 ± 0.03 <sup>c</sup>  | 3.85 ± 0.65 <sup>b</sup>   | 0.84 ± 0.00 <sup>d</sup>  |
| γ-aminobutyric acid                  | 91.10 ± 0.08 <sup>a</sup>  | 11.91 ± 0.01 <sup>c</sup> | 68.66 ± 0.62 <sup>b</sup>  | 7.91 ± 0.07 <sup>d</sup>  | 67.36 ± 0.81 <sup>b</sup>  | 10.22 ± 0.15 <sup>d</sup> | 87.17 ± 1.52 <sup>a</sup>  | 12.55 ± 0.24 <sup>c</sup> |
| Aminoethanol                         | 13.58 ± 0.12 <sup>a</sup>  | 1.54 ± 0.02 <sup>c</sup>  | 9.61 ± 0.08 <sup>b</sup>   | 1.23 ± 0.01 <sup>c</sup>  | 7.11 ± 0.02 <sup>b</sup>   | 1.10 ± 0.00 <sup>c</sup>  | 8.02 ± 0.08 <sup>b</sup>   | 1.38 ± 0.01 <sup>c</sup>  |
| Hydroxylysine                        | 1.74 ± 0.01 <sup>a</sup>   | 1.28 ± 0.05 <sup>c</sup>  | 1.63 ± 0.01 <sup>a</sup>   | 1.18 ± 0.01 <sup>d</sup>  | 1.57 ± 0.01 <sup>b</sup>   | 1.19 ± 0.00 <sup>d</sup>  | 1.48 ± 0.01 <sup>b</sup>   | 1.20 ± 0.01 <sup>c</sup>  |
| Ornithine                            | 11.11 ± 0.12 <sup>a</sup>  | 2.47 ± 0.01 <sup>c</sup>  | 9.83 ± 0.08 <sup>a</sup>   | 1.88 ± 0.00 <sup>d</sup>  | 7.70 ± 0.07 <sup>b</sup>   | 1.74 ± 0.01 <sup>d</sup>  | 7.51 ± 0.08 <sup>b</sup>   | 1.98 ± 0.01 <sup>d</sup>  |
| Arginine                             | 170.94 ± 1.21 <sup>b</sup> | 25.96 ± 0.25 <sup>d</sup> | 149.32 ± 5.12 <sup>c</sup> | 12.13 ± 0.12 <sup>e</sup> | 157.72 ± 4.16 <sup>c</sup> | 11.92 ± 0.25 <sup>e</sup> | 200.59 ± 4.01 <sup>a</sup> | 32.01 ± 0.31 <sup>d</sup> |
| Total                                | 720.44                     | 160.02                    | 500.68                     | 93.43                     | 455.67                     | 97.09                     | 563.61                     | 130.37                    |
| <b>Essential amino acids</b>         |                            |                           |                            |                           |                            |                           |                            |                           |
| Threonine                            | 36.21 ± 0.32 <sup>a</sup>  | 7.90 ± 0.01 <sup>c</sup>  | 20.85 ± 0.12 <sup>b</sup>  | 4.33 ± 0.04 <sup>d</sup>  | 20.20 ± 0.51 <sup>b</sup>  | 4.57 ± 0.01 <sup>d</sup>  | 24.38 ± 0.50 <sup>b</sup>  | 4.62 ± 0.01 <sup>d</sup>  |
| Valine                               | 61.38 ± 0.62 <sup>a</sup>  | 17.55 ± 0.15 <sup>c</sup> | 35.81 ± 0.81 <sup>b</sup>  | 9.18 ± 0.08 <sup>d</sup>  | 32.05 ± 0.62 <sup>b</sup>  | 10.09 ± 0.30 <sup>d</sup> | 34.13 ± 0.75 <sup>b</sup>  | 9.79 ± 0.09 <sup>d</sup>  |
| Methionine                           | 16.35 ± 0.14 <sup>a</sup>  | nd                        | 4.03 ± 0.01 <sup>c</sup>   | nd                        | 3.55 ± 0.01 <sup>d</sup>   | nd                        | 4.16 ± 0.01 <sup>b</sup>   | nd                        |
| Isoleucine                           | 41.55 ± 0.41 <sup>a</sup>  | 17.62 ± 0.14 <sup>c</sup> | 22.63 ± 0.45 <sup>b</sup>  | 10.73 ± 0.15 <sup>d</sup> | 21.41 ± 0.45 <sup>b</sup>  | 10.35 ± 0.24 <sup>d</sup> | 26.80 ± 0.62 <sup>b</sup>  | 11.67 ± 0.21 <sup>d</sup> |
| Leucine                              | 51.18 ± 0.11 <sup>a</sup>  | 7.87 ± 0.08 <sup>d</sup>  | 30.57 ± 0.61 <sup>b</sup>  | 7.13 ± 0.07 <sup>d</sup>  | 27.31 ± 0.56 <sup>c</sup>  | 7.18 ± 0.00 <sup>d</sup>  | 33.33 ± 0.76 <sup>b</sup>  | 7.25 ± 0.07 <sup>d</sup>  |
| Phenylalanine                        | 43.39 ± 0.45 <sup>a</sup>  | 5.93 ± 0.05 <sup>c</sup>  | 21.81 ± 0.21 <sup>b</sup>  | 5.17 ± 0.05 <sup>d</sup>  | 20.11 ± 0.45 <sup>b</sup>  | 5.37 ± 0.02 <sup>d</sup>  | 24.58 ± 0.52 <sup>b</sup>  | 5.26 ± 0.56 <sup>d</sup>  |
| Lysine                               | 40.79 ± 0.25 <sup>a</sup>  | 2.39 ± 0.02 <sup>d</sup>  | 28.77 ± 0.51 <sup>b</sup>  | nd                        | 20.78 ± 0.64 <sup>c</sup>  | 1.57 ± 0.00 <sup>d</sup>  | 24.00 ± 0.49 <sup>b</sup>  | 2.05 ± 0.02 <sup>d</sup>  |

|                          |                           |                           |                           |                           |                           |                           |                           |                          |
|--------------------------|---------------------------|---------------------------|---------------------------|---------------------------|---------------------------|---------------------------|---------------------------|--------------------------|
| Histidine                | 16.41 ± 0.15 <sup>a</sup> | 1.06 ± 0.14 <sup>d</sup>  | 11.65 ± 0.21 <sup>b</sup> | 0.90 ± 0.00 <sup>d</sup>  | 8.74 ± 0.21 <sup>c</sup>  | 0.79 ± 0.00 <sup>d</sup>  | 12.67 ± 0.25 <sup>b</sup> | 0.99 ± 0.99 <sup>d</sup> |
| Total                    | 307.26                    | 60.32                     | 176.12                    | 37.44                     | 154.15                    | 39.92                     | 184.05                    | 41.63                    |
| <b>Total amino acids</b> | 1027.70                   | 220.34                    | 676.80                    | 130.87                    | 609.82                    | 137.01                    | 747.66                    | 172.00                   |
| Ammonia                  | 22.48 ± 0.25 <sup>a</sup> | 15.37 ± 0.14 <sup>b</sup> | 14.88 ± 0.21 <sup>b</sup> | 12.10 ± 0.24 <sup>c</sup> | 14.16 ± 0.28 <sup>b</sup> | 11.94 ± 0.21 <sup>c</sup> | 15.83 ± 0.32 <sup>b</sup> | 9.89 ± 0.01 <sup>d</sup> |

<sup>1</sup>Data are expressed as the mean ± SD, and differences were analyzed using Tukey's test,  $n = 3$ . The results without common superscript letters (a to e) within the same row were statistically different ( $p < 0.05$ ).

<sup>2</sup>Abbreviation: MCGS, mountain-cultivated ginseng sprouts and FAMCGS, fermented aging mountain-cultivated ginseng sprouts.

<sup>3</sup>nd: not detected.

**Table S2.** Comparisons of mineral compositions of raw material and fermentation according to the harvest periods of mountain-cultivated ginseng sprouts.

| Contents <sup>1</sup><br>(mg/ 100 g) | Harvest periods           |                           |                           |                          |                           |                          |                          |                          |
|--------------------------------------|---------------------------|---------------------------|---------------------------|--------------------------|---------------------------|--------------------------|--------------------------|--------------------------|
|                                      | 17-May                    |                           | 31-May                    |                          | 21-June                   |                          | 13-July                  |                          |
|                                      | MCGS <sup>2</sup>         | FAMCGS                    | MCGS                      | FAMCGS                   | MCGS                      | FAMCGS                   | MCGS                     | FAMCGS                   |
| Phosphorus (P)                       | 2.17 ± 0.03 <sup>a</sup>  | 2.29 ± 0.04 <sup>a</sup>  | 1.99 ± 0.02 <sup>b</sup>  | 1.73 ± 0.02 <sup>c</sup> | 1.59 ± 0.02 <sup>d</sup>  | 1.74 ± 0.03 <sup>c</sup> | 1.46 ± 0.02 <sup>d</sup> | 1.72 ± 0.03 <sup>c</sup> |
| Sulfur (S)                           | 2.65 ± 0.05 <sup>a</sup>  | 2.97 ± 0.05 <sup>a</sup>  | 2.29 ± 0.03 <sup>d</sup>  | 2.34 ± 0.04 <sup>c</sup> | 2.36 ± 0.03 <sup>c</sup>  | 2.54 ± 0.05 <sup>b</sup> | 2.16 ± 0.04 <sup>d</sup> | 2.43 ± 0.06 <sup>b</sup> |
| Kalium (K)                           | 14.89 ± 0.14 <sup>a</sup> | 12.45 ± 0.12 <sup>b</sup> | 11.62 ± 0.12 <sup>b</sup> | 7.44 ± 0.07 <sup>d</sup> | 15.11 ± 0.15 <sup>a</sup> | 9.92 ± 0.09 <sup>c</sup> | 9.47 ± 0.10 <sup>c</sup> | 9.16 ± 0.11 <sup>c</sup> |
| Calcium (Ca)                         | 6.69 ± 0.06 <sup>d</sup>  | 7.59 ± 0.07 <sup>b</sup>  | 6.83 ± 0.05 <sup>d</sup>  | 7.40 ± 0.09 <sup>b</sup> | 7.01 ± 0.07 <sup>c</sup>  | 7.91 ± 0.07 <sup>a</sup> | 6.75 ± 0.09 <sup>d</sup> | 7.29 ± 0.08 <sup>b</sup> |
| Magnesium (Mg)                       | 2.15 ± 0.03 <sup>a</sup>  | 2.23 ± 0.05 <sup>a</sup>  | 2.13 ± 0.03 <sup>a</sup>  | 1.93 ± 0.02 <sup>c</sup> | 1.82 ± 0.01 <sup>d</sup>  | 1.84 ± 0.12 <sup>d</sup> | 1.97 ± 0.03 <sup>b</sup> | 1.92 ± 0.02 <sup>c</sup> |
| Iron (Fe)                            | 0.71 ± 0.01 <sup>a</sup>  | 0.75 ± 0.02 <sup>a</sup>  | 0.57 ± 0.01 <sup>b</sup>  | 0.78 ± 0.01 <sup>a</sup> | 0.35 ± 0.01 <sup>d</sup>  | 0.46 ± 0.01 <sup>c</sup> | 0.44 ± 0.02 <sup>c</sup> | 0.49 ± 0.02 <sup>b</sup> |
| Zinc (Zn)                            | 0.02 ± 0.00 <sup>a</sup>  | 0.02 ± 0.00 <sup>a</sup>  | 0.02 ± 0.00 <sup>a</sup>  | 0.02 ± 0.00 <sup>a</sup> | 0.02 ± 0.00 <sup>a</sup>  | 0.02 ± 0.00 <sup>a</sup> | 0.01 ± 0.00 <sup>b</sup> | 0.02 ± 0.00 <sup>a</sup> |
| Manganese (Mn)                       | 0.06 ± 0.00 <sup>a</sup>  | 0.06 ± 0.00 <sup>a</sup>  | 0.04 ± 0.00 <sup>b</sup>  | 0.04 ± 0.00 <sup>b</sup> | 0.03 ± 0.00 <sup>c</sup>  | 0.04 ± 0.00 <sup>b</sup> | 0.03 ± 0.00 <sup>c</sup> | 0.04 ± 0.00 <sup>b</sup> |
| Titanium (Ti)                        | 0.06 ± 0.00 <sup>a</sup>  | 0.06 ± 0.00 <sup>a</sup>  | 0.05 ± 0.00 <sup>b</sup>  | 0.06 ± 0.00 <sup>a</sup> | 0.03 ± 0.00 <sup>d</sup>  | 0.04 ± 0.00 <sup>c</sup> | 0.04 ± 0.00 <sup>c</sup> | 0.04 ± 0.00 <sup>c</sup> |
| Sodium (Na)                          | 0.49 ± 0.01 <sup>c</sup>  | 0.71 ± 0.01 <sup>b</sup>  | 0.26 ± 0.01 <sup>d</sup>  | 0.81 ± 0.00 <sup>a</sup> | 0.35 ± 0.01 <sup>c</sup>  | 0.87 ± 0.02 <sup>a</sup> | 0.14 ± 0.01 <sup>d</sup> | 0.68 ± 0.01 <sup>b</sup> |
| Aluminum (Al)                        | 1.03 ± 0.03 <sup>b</sup>  | 1.90 ± 0.03 <sup>a</sup>  | 0.82 ± 0.02 <sup>b</sup>  | 1.07 ± 0.01 <sup>b</sup> | 0.48 ± 0.02 <sup>d</sup>  | 0.64 ± 0.01 <sup>c</sup> | 0.66 ± 0.02 <sup>c</sup> | 0.69 ± 0.01 <sup>c</sup> |
| Total                                | 30.92                     | 31.03                     | 26.62                     | 23.62                    | 29.15                     | 26.02                    | 23.13                    | 24.48                    |

<sup>1</sup> Data are expressed as the mean ± SD, and differences were analyzed using Tukey's test,  $n = 3$ . The results without common superscript letters (a to d) within the same row were statistically different ( $p < 0.05$ ).

<sup>2</sup> Abbreviation: MCGS, mountain-cultivated ginseng sprouts and FAMCGS, fermented aging mountain-cultivated ginseng sprouts.

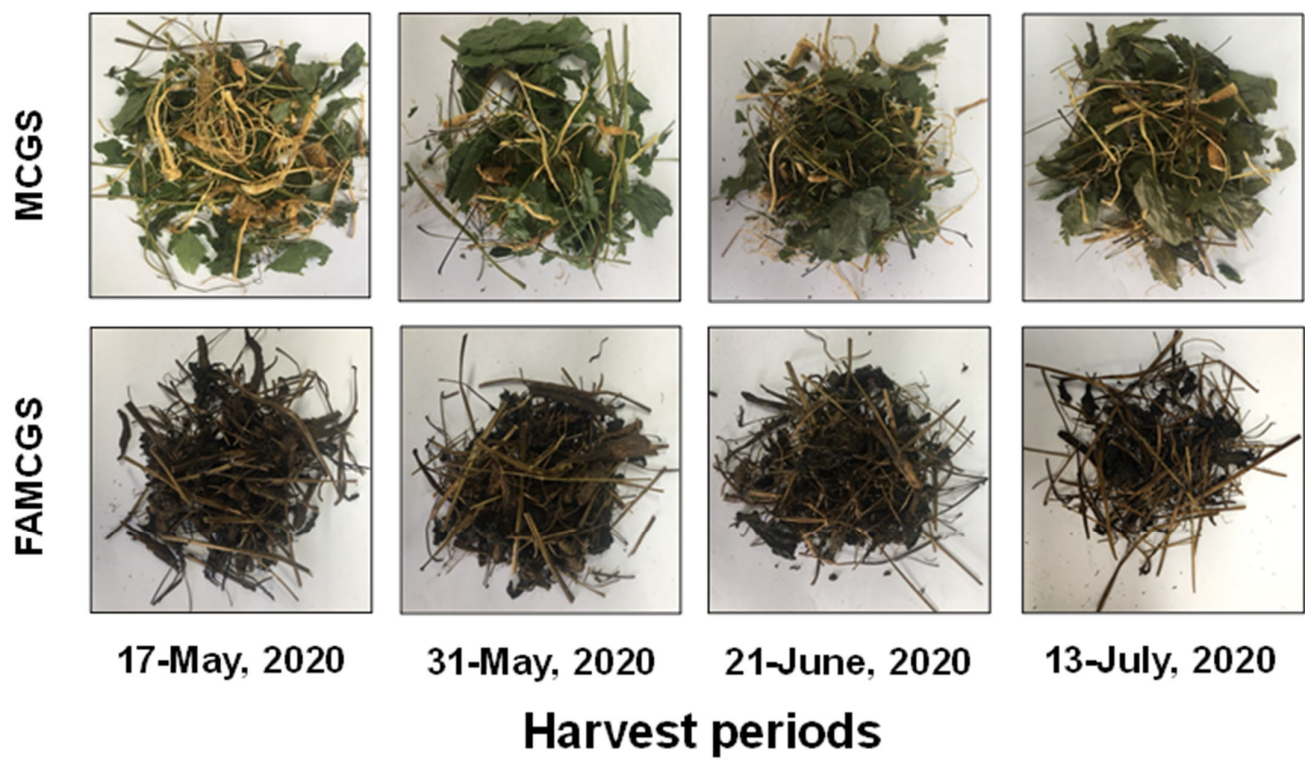

**Figure S1.** Photograph of raw material and fermentation according to the harvest periods of mountain-cultivated ginseng sprouts.
